# Supplementary material
Source: PubMed Central journal article supplement (PMC3761569)
Supplement: 1308306110_pnas.201308306SI.pdf [file 1308306110_pnas.201308306SI.pdf]

# Supporting Information

Zhao et al. 10.1073/pnas.1308306110

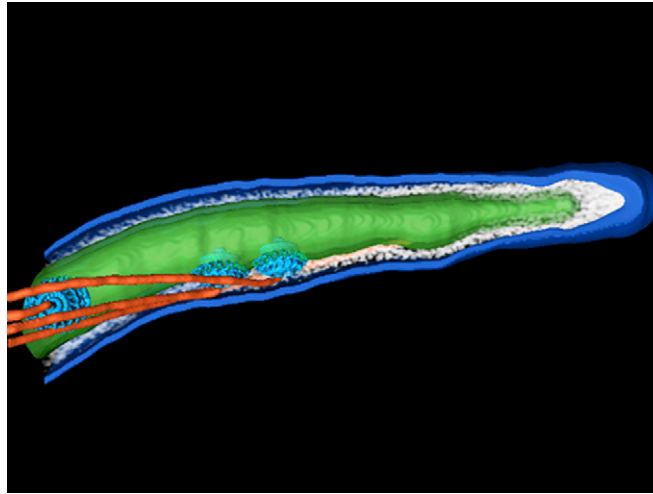

Movie S1. Three-dimensional reconstruction and surface rendering from a wild-type cell of *B. burgdorferi*.

[Movie S1](#)

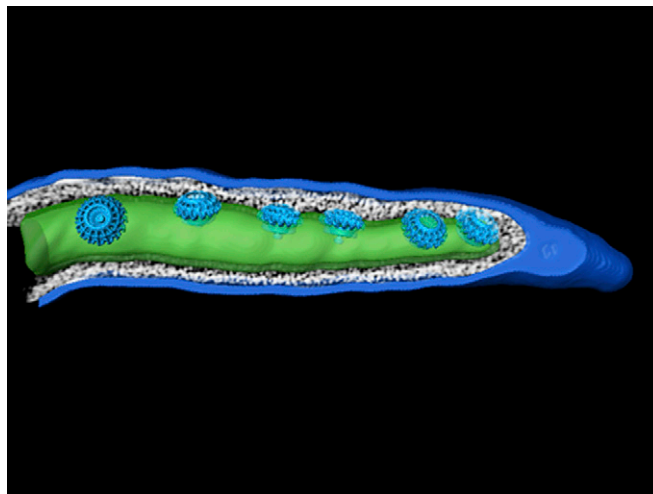

Movie S2. Three-dimensional reconstruction and surface rendering from a rod mutant  $\Delta fliE$  cell of *B. burgdorferi*.

[Movie S2](#)

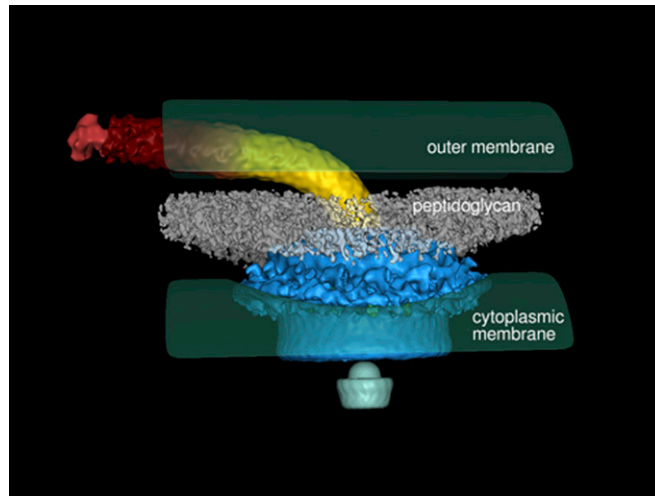

Movie S3. Three-dimensional visualization of the flagellar assembly process in *B. burgdorferi*.

[Movie S3](#)

## Other Supporting Information Files

[SI Appendix \(PDF\)](#)
